# Supplementary material for: Hybrid LiV3O8/carbon encapsulated Li1.2Mn0.54Co0.13Ni0.13O2 with improved electrochemical properties for lithium ion batteries
Source: Royal Society of Chemistry journal article supplement (doi:10.1039/c6ra02688e), 2016-01-01
Supplement: c6ra02688e1.pdf [file c6ra02688e1.pdf]

## Supporting information

### Hybrid $\text{LiV}_3\text{O}_8$ /carbon encapsulated $\text{Li}_{1.2}\text{Mn}_{0.54}\text{Co}_{0.13}\text{Ni}_{0.13}\text{O}_2$ with improved electrochemical properties for lithium-ion batteries

Kailing Sun<sup>a</sup>, Can Peng<sup>a</sup>, Zhaohui Li<sup>a,\*</sup>, Qichang Xiao<sup>a</sup>, Gangtie Lei<sup>a</sup>, Qizhen Xiao<sup>a</sup>,

Yanhuai Ding<sup>b</sup>, Zhongliang Hu<sup>c</sup>

<sup>a</sup> Key Laboratory of Environmentally Friendly Chemistry and Applications of Ministry of Education,

College of Chemistry, Xiangtan University, Hunan 411105, P.R. China

<sup>b</sup> Institute of Fundamental Mechanics and Materials Engineering, Xiangtan University, Hunan 411105,

P.R. China

<sup>c</sup> College of Metallurgic Engineering, Hunan University of Technology, Hunan 412007, P.R. China

The Thermo-gravimetric (TG) measurement was carried out in air over the temperature range of 25°C-600 °C at a rising rate of 10 °C min<sup>-1</sup> using a TQA 50 instrument. Fig. S1 presents the TG and DTG curves of the mixture of sucrose and  $\text{NH}_4\text{VO}_3$  with a mass ratio of 4.5:2.0 (a), and the precursor of the LMSSVC (b).

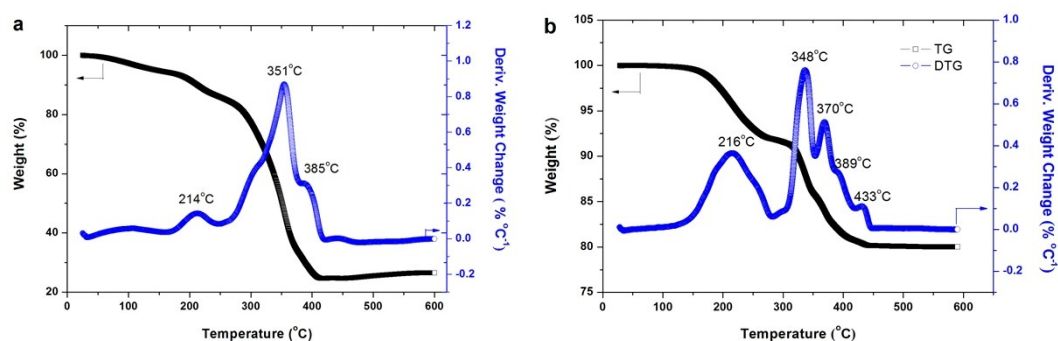

Fig. S1. TG and DTG curves of the mixture of sucrose and  $\text{NH}_4\text{VO}_3$  (a) and the precursor of LMSSVC (b) in air.

\* Corresponding author, Tel.: +86 731 58292206; fax: +86 731 58292251.  
E-mail address: [lzh69@xtu.edu.cn](mailto:lzh69@xtu.edu.cn) (Z.H. Li)

It is found that  $\text{NH}_4\text{VO}_3$  is decomposed at 214 °C to form  $\text{V}_2\text{O}_5$  while the sucrose is carbonized at 351 °C in the mixture (Fig. S1a). The weak exothermic peak at 385 °C might be relative to crystallization of  $\text{V}_2\text{O}_5$ . When the temperature is raised to 450 °C, the mixture lost its weight slightly and retained about 25% of its initial weight. Therefore, the mixture was fired at 250 °C for 3h in static air and 450 °C for 2 h to prepare vanadium oxide/carbon composite. The LMSSVC precursor displayed the similar decomposition temperatures of the sucrose (348 °C) and  $\text{NH}_4\text{VO}_3$  (216 °C), and the similar crystallization temperature (389 °C). Besides, two additional exothermic peaks appeared at 370 °C and 433 °C, which possibly result from chemical leaching effect and phase transformation, forming the  $\text{LiV}_3\text{O}_8$  and spinel components, respectively.

The as-prepared LMSSVC (12.46 g) was dissolved into a concentrated HCl acid and filtered. The black filter residue was washed to pH=7 by water, carefully collected and dried at 80 °C under vacuum overnight. The dried filter residue weighed to about  $4.78 \pm 0.03$  wt% of the LMSSVC. The concentration of V in the acidic solution was determined by ICP-AES thus the calculated amount of  $\text{LiV}_3\text{O}_8$  equals to ~1.85 g in the 12.46 g of LMSSVC. Consequently, the contents of  $\text{LiV}_3\text{O}_8$  and carbon are 14.85 wt% and 4.78 wt%, respectively.

The crystal structure of the mixture of  $\text{NH}_4\text{VO}_3$  and sucrose after fired in static air was determined from the XRD pattern, which is shown in Fig. S2. It can be seen that the diffraction peaks are in good with those of the standard card of JCPDS No. 41-1426, which belongs to the orthorhombic  $\text{V}_2\text{O}_5$ . The carbon did not show its diffraction peaks because of its amorphous phase.

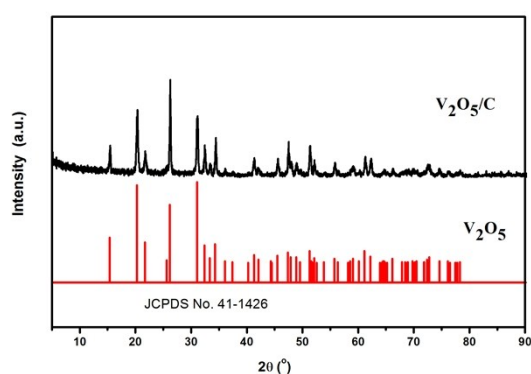

Fig. S2. XRD diffraction pattern of the mixture after fired at 250 °C in static air for 3 h and then at 450 °C for 2 h.

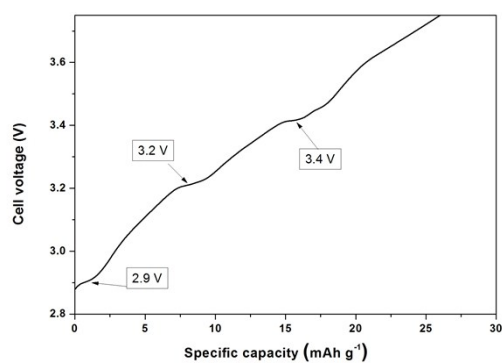

Fig. S3. Charging curve of the LMSSVC at 0.1C rate in the first cycle over the voltage range of 2.8-3.75 V at room temperature.
